# Supplementary material for: Comparative Proteomic Profiling of Secreted Extracellular Vesicles from Breast Fibroadenoma and Malignant Lesions: A Pilot Study
Source: MDPI journal article supplement (doi:10.3390/ijms23073989), 2022-04-03
Supplement: s1 [file s1]

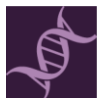

## *Supplementary Material*

### **1.1 Supplementary Tables**

Table S1 attached to Figure 3

### **1.2 Supplementary Figures**

Figure S1 attached to Figure 2

Figure S2 attached to Figure 3

Figure S3 attached to Figure 3

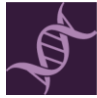

**Table S1.** 49 common protein annotations between patient-derived and immortalized breast cell cultures (IBCC) (continuous cells).

| Gene stable ID  | Protein name            | Protein_IDs                               | Location            | Type(s)                | Gene description                   | Gene_ID |
|-----------------|-------------------------|-------------------------------------------|---------------------|------------------------|------------------------------------|---------|
| ENSG00000175899 | A2M                     | P01023                                    | Extracellular Space | transporter            | alpha-2-macroglobulin              | 7       |
| ENSG00000143632 | ACTA1;ACTC1;ACTG2;ACTA2 | P68133;P68032;P63267;P62736               | Cytoplasm           | other                  | actin alpha 1. skeletal muscle     | 129     |
| ENSG00000075624 | ACTB                    | P60709;Q6S8J3;A5A3E0;P0CG38;Q9BYX7;P0CG39 | Cytoplasm           | other                  | actin beta                         | 132     |
| ENSG00000169067 | ACTBL2                  | Q562R1                                    | Nucleus             | other                  | actin beta like 2                  | 17780   |
| ENSG00000184009 | ACTG1                   | P63261                                    | Cytoplasm           | other                  | actin gamma 1                      | 144     |
| ENSG00000101444 | AHCY                    | P23526                                    | Cytoplasm           | enzymes                | adenosylhomocysteinase             | 343     |
| ENSG00000149925 | ALDOA                   | P04075                                    | Cytoplasm           | enzymes                | aldolase. fructose-bisphosphate A  | 414     |
| ENSG00000240038 | AMY2B;AMY2A;AMY1A       | P19961;P04746;P04745                      | Extracellular Space | enzymes                | amylase alpha 2B                   | 478     |
| ENSG00000118137 | APOA1                   | P02647                                    | Extracellular Space | transporter            | apolipoprotein A1                  | 600     |
| ENSG00000273686 | B2M                     | P61769                                    | Plasma Membrane     | transmembrane receptor | beta-2-microglobulin               | 914     |
| ENSG00000214324 | C3orf56                 | Q8N813                                    | Other               | other                  | chromosome 3 open reading frame 56 | 32481   |
| ENSG00000164692 | COL1A2                  | P08123                                    | Extracellular Space | other                  | collagen type I alpha 2 chain      | 2198    |
| ENSG00000168542 | COL3A1                  | P02461                                    | Extracellular Space | other                  | collagen type III alpha 1 chain    | 2201    |

| Gene stable ID  | Protein name           | Protein_IDs                        | Location            | Type(s)     | Gene description                                                | Gene_ID |
|-----------------|------------------------|------------------------------------|---------------------|-------------|-----------------------------------------------------------------|---------|
| ENSG00000138495 | COX17                  | Q14061                             | Cytoplasm           | enzymes     | cytochrome c oxidase copper chaperone COX17                     | 2264    |
| ENSG00000126545 | CSN1S1                 | P47710                             | Extracellular Space | other       | casein alpha s1                                                 | 2445    |
| ENSG00000135222 | CSN2                   | P05814                             | Extracellular Space | kinase      | casein beta                                                     | 2447    |
| ENSG00000171209 | CSN3                   | P07498                             | Extracellular Space | other       | casein kappa                                                    | 2446    |
| ENSG00000161634 | DCD                    | P81605                             | Extracellular Space | other       | dermcidin                                                       | 14669   |
| ENSG00000196205 | EEF1A1P5;EEF1A1;EEF1A2 | Q5VTE0;P68104;Q05639               | Extracellular Space | other       | eukaryotic translation elongation factor 1 alpha 1 pseudogene 5 | 3200    |
| ENSG00000074800 | ENO1                   | P06733;P13929                      | Cytoplasm           | enzymes     | enolase 1                                                       | 3350    |
| ENSG00000177294 | FBXO39                 | Q8N4B4                             | Other               | other       | F-box protein 39                                                | 28565   |
| ENSG00000111640 | GAPDH                  | P04406;O14556                      | Cytoplasm           | enzymes     | glyceraldehyde-3-phosphate dehydrogenase                        | 4141    |
| ENSG00000206172 | HBA1                   | P69905                             | Extracellular Space | transporter | hemoglobin subunit alpha 1                                      | 4823    |
| ENSG00000244734 | HBB                    | P68871;P02042;P69892;P69891;P02100 | Cytoplasm           | transporter | hemoglobin subunit beta                                         | 4827    |
| ENSG00000080824 | HSP90AA1               | P07900;Q14568;Q58FF8;Q58FF7;Q58FG1 | Cytoplasm           | enzymes     | heat shock protein 90 alpha family class A member 1             | 5253    |
| ENSG00000173110 | HSPA6;HSPA7            | P17066;P48741                      | Nucleus             | enzymes     | heat shock protein family A (Hsp70) member 6                    | 5239    |

| Gene stable ID  | Protein name   | Protein IDs                            | Location            | Type(s)   | Gene description                             | Gene_ID |
|-----------------|----------------|----------------------------------------|---------------------|-----------|----------------------------------------------|---------|
| ENSG00000109971 | HSPA8          | P11142; P54652                         | Cytoplasm           | enzymes   | heat shock protein family A (Hsp70) member 8 | 5241    |
| ENSG00000138182 | KIF20B         | Q96Q89                                 | Nucleus             | enzymes   | kinesin family member 20B                    | 7212    |
| ENSG00000172867 | KRT2           | P35908                                 | Cytoplasm           | other     | keratin 2                                    | 6439    |
| ENSG00000134333 | LDHA           | P00338; Q6ZMR3; P07864                 | Cytoplasm           | enzymes   | lactate dehydrogenase A                      | 6535    |
| ENSG00000134013 | LOXL2          | Q9Y4K0                                 | Extracellular Space | enzymes   | lysyl oxidase like 2                         | 6666    |
| ENSG00000012223 | LTF            | P02788                                 | Extracellular Space | peptidase | lactotransferrin                             | 6720    |
| ENSG00000125148 | MT2A;MT1X;MT1G | P02795; P80297; P13640; P80294; P04731 | Cytoplasm           | other     | metallothionein 2A                           | 7406    |
| ENSG00000185624 | P4HB           | P07237                                 | Cytoplasm           | enzymes   | prolyl 4-hydroxylase subunit beta            | 8548    |
| ENSG00000108518 | PFN1           | P07737                                 | Cytoplasm           | other     | profilin 1                                   | 8881    |
| ENSG00000102144 | PGK1           | P00558                                 | Cytoplasm           | kinase    | phosphoglycerate kinase 1                    | 8896    |
| ENSG00000067225 | PKM            | P14618                                 | Cytoplasm           | kinase    | pyruvate kinase M1/2                         | 9021    |
| ENSG00000138207 | RBP4           | P02753                                 | Extracellular Space | other     | retinol binding protein 4                    | 9922    |
| ENSG00000197249 | SERPINA1       | P01009                                 | Extracellular Space | other     | serpin family A member 1                     | 8941    |
| ENSG00000113140 | SPARC          | P09486                                 | Extracellular Space | other     | secreted protein acidic and cysteine rich    | 11219   |
| ENSG00000137801 | THBS1          | P07996                                 | Extracellular Space | other     | thrombospondin 1                             | 11785   |
| ENSG00000113296 | THBS4          | P35443                                 | Extracellular Space | other     | thrombospondin 4                             | 11788   |

| Gene stable ID  | Protein name        | Protein_IDs                        | Location            | Type(s)  | Gene description                   | Gene_ID |
|-----------------|---------------------|------------------------------------|---------------------|----------|------------------------------------|---------|
| ENSG00000102265 | TIMP1               | P01033                             | Extracellular Space | cytokine | TIMP metalloproteinase inhibitor 1 | 11820   |
| ENSG00000205542 | TMSB4X              | P62328                             | Cytoplasm           | other    | thymosin beta 4 X-linked           | 11881   |
| ENSG00000111669 | TPI1                | P60174                             | Cytoplasm           | enzymes  | triosephosphate isomerase 1        | 12009   |
| ENSG00000167552 | TUBA1A;TUBA3E;TUBA8 | Q71U36;P0DPH8;P0DPH7;Q6PEY2;Q9NY65 | Cytoplasm           | other    | tubulin alpha 1a                   | 20766   |
| ENSG00000123416 | TUBA1B              | P68363;A6NHL2                      | Cytoplasm           | other    | tubulin alpha 1b                   | 18809   |
| ENSG00000167553 | TUBA1C              | Q9BQE3                             | Cytoplasm           | other    | tubulin alpha 1c                   | 20768   |
| ENSG00000071127 | WDR1                | O75083                             | Extracellular Space | other    | WD repeat domain 1                 | 12754   |



**Figure S1** attached to **Figure 2**

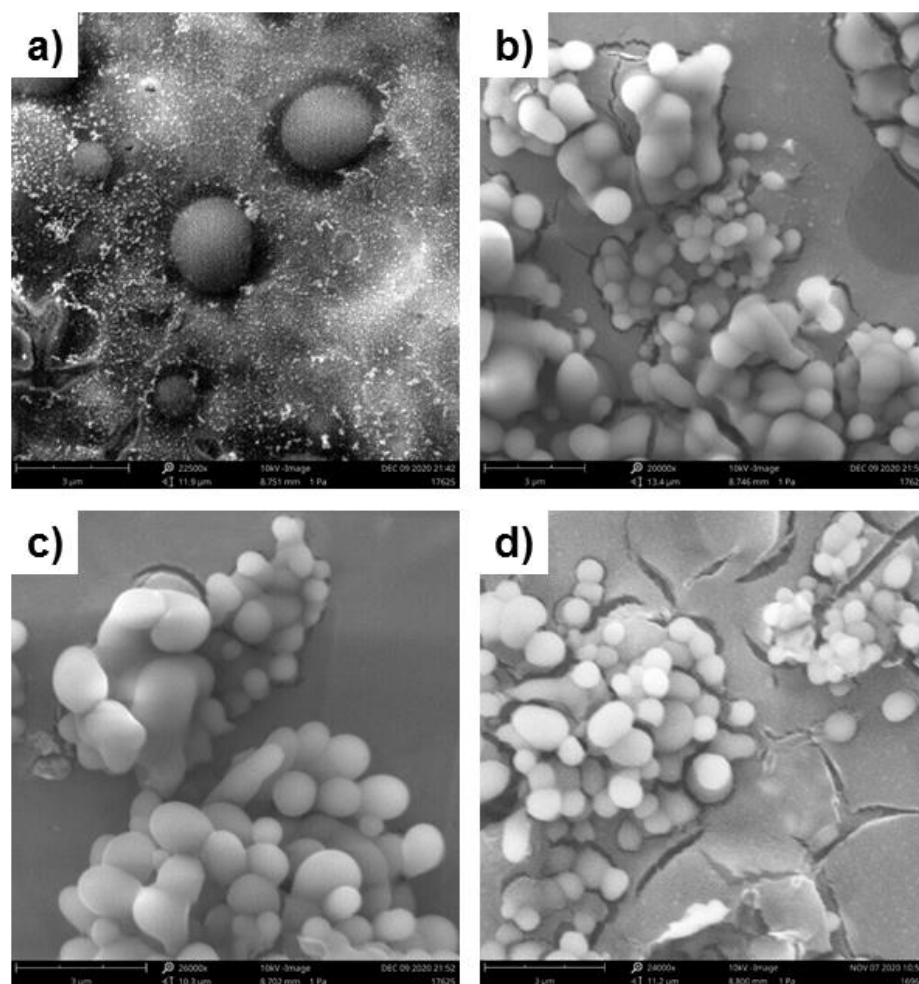

**Figure S1.** SEM micrographs for exosomes drop-casted on aluminium stubs: a) exosomes 37; b) exosomes 44, c) exosomes 148 and d) exosomes MDA-M3231. Magnification and scale bar for all samples is 24000x, 3µm.

**Figure S2 attached to Figure 3**

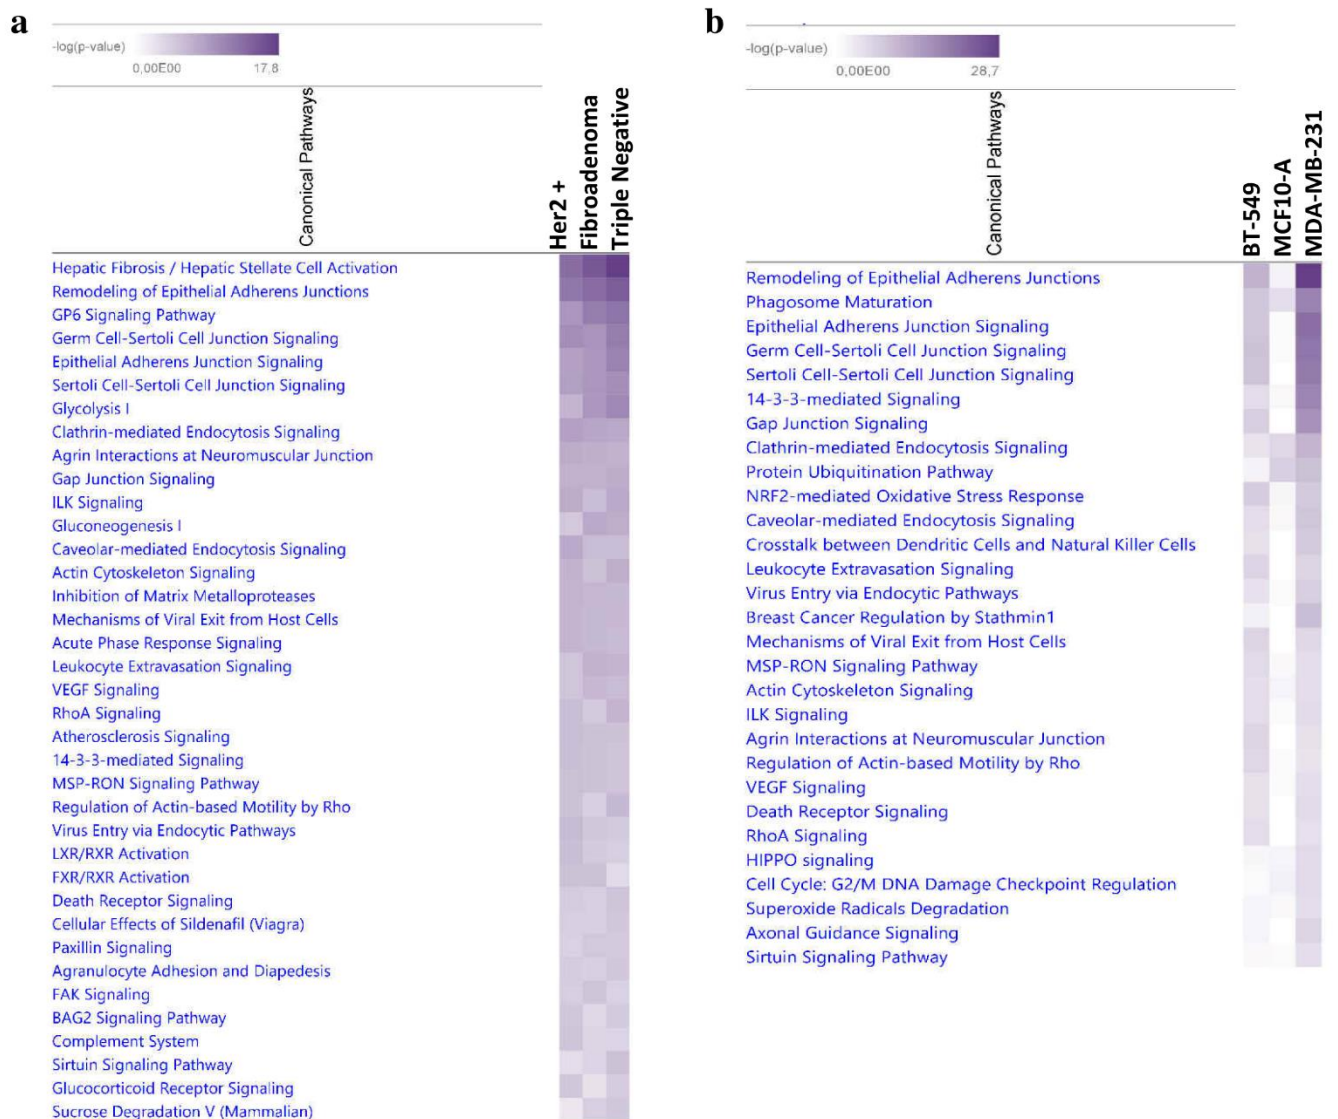

**Figure S2.** Pathway analysis of exosome cargoes. a) and b) Heatmap of the EVs from patient-derived and model breast cells enriched pathways, respectively. Enrichment score threshold  $\geq 5$  (Fisher's Exact right-tailed test).

**Figure S3 attached to Figure 3**

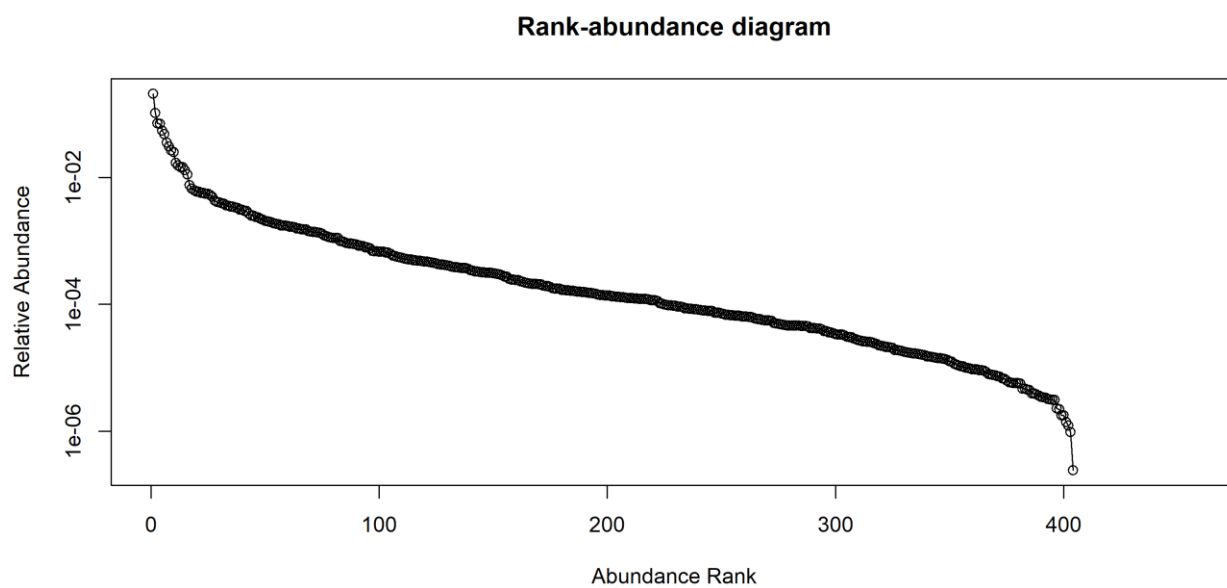

**Figure S3.** LFQ intensity protein rank-abundance curve. The y-axis is displayed on a log-scale, MaxQuant output.
